# Supplementary material for: Plasmon coupling behavior in aluminium nanoparticle arrangements
Source: Royal Society of Chemistry journal article supplement (doi:10.1039/c6tc04072a), 2016-01-01
Supplement: c6tc04072a1.pdf [file c6tc04072a1.pdf]

## **Supplementary Information**

# **Plasmon Coupling Behavior in Aluminium Nanoparticle Arrangements**

Junais Habeeb Mokkath,  
mokkath.junais@nims.go.jp

International Center for Materials Nanoarchitectonics (WPI-MANA), National  
Institute for Materials Science (NIMS) 1-1 Namiki, Ibaraki 305-0044, Tsukuba, Japan

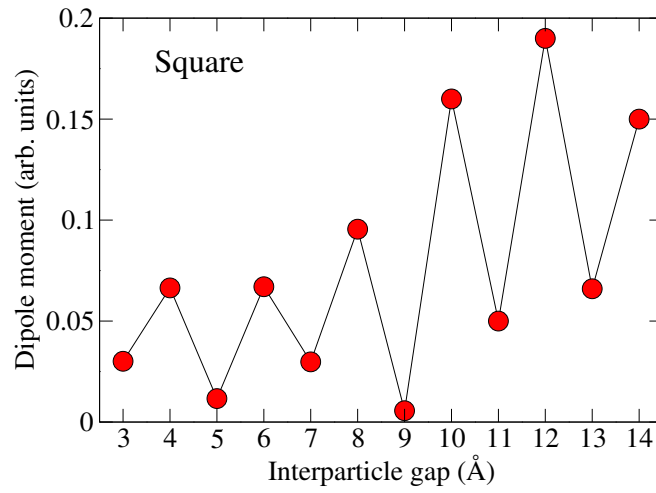

**Figure S1:** dipole moment evolution in the square arrangement as a function of the interparticle gaps.

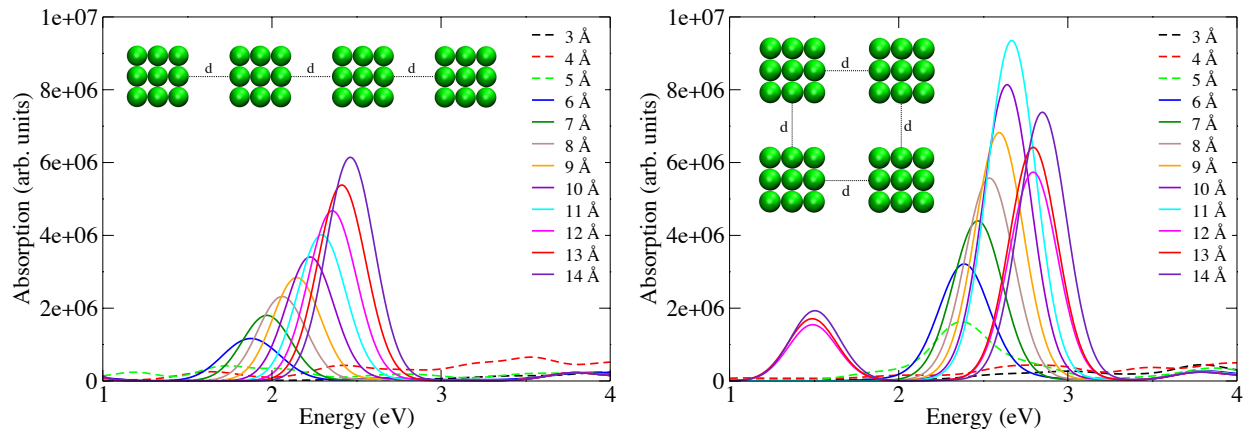

**Figure S2:** absorption spectrum of cube shaped Al nanoparticle arrangements.
